# Supplementary material for: Well-defined hierarchical teddy bear sunflower-like NiCo2O4electrocatalyst for superior water oxidation
Source: Royal Society of Chemistry journal article supplement (doi:10.1039/d2se01111e), 2022-01-01
Supplement: d2se01111e1.pdf [file d2se01111e1.pdf]

## Supporting Information

### Well-Defined Hierarchical Teddy Bear Sunflower-Like NiCo<sub>2</sub>O<sub>4</sub> electrocatalyst for Superior Water Oxidation

Pradnya M. Bodhankar,<sup>a,b</sup> Dattatray S. Dhawale,<sup>\*c</sup> Sarbjit Giddey,<sup>c</sup> Ravi Kumar,<sup>d,e</sup> and Pradip B. Sarawade,<sup>\*a,b</sup>

<sup>a</sup>*National Centre for Nanosciences and Nanotechnology, University of Mumbai, Kalina, Mumbai-400098, India.*

<sup>b</sup>*Department of Physics, University of Mumbai, Kalina, Mumbai-400098, India.*

<sup>c</sup>*CSIRO Energy, Private Bag 10, Victoria, Clayton South 3169, Australia.*

<sup>d</sup>*Academy of Scientific and Innovative Research, CSIR-Human Resource Development Center (CSIR-HRDC) Campus, Postal Staff College Area, Ghaziabad, Uttar Pradesh, 201002, India*

<sup>e</sup>*Electronic Structure Theory Group, Physical and Materials Chemistry Division, CSIR-National Chemical Laboratory, Pune, 411008, India*

Corresponding Author

\*E-mail: [dattatray.dhawale@csiro.au](mailto:dattatray.dhawale@csiro.au), [pradipsarawade@yahoo.co.in](mailto:pradipsarawade@yahoo.co.in)

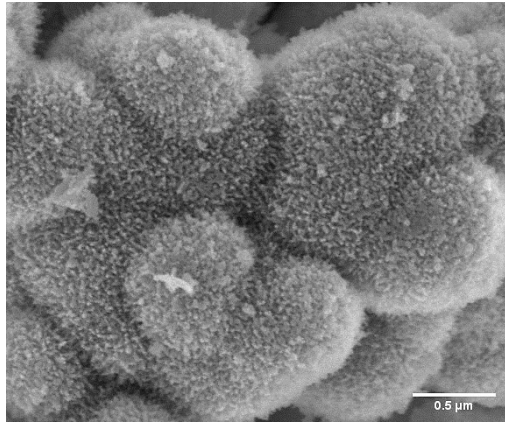

NiO

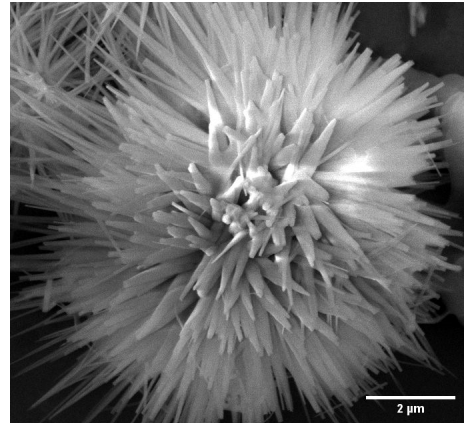

Co<sub>3</sub>O<sub>4</sub>

**Fig. S1.** FE-SEM images of NiO and Co<sub>3</sub>O<sub>4</sub> samples.

**Table S1.** Lattice parameters extracted from XRD data.

| Sample                           | Lattice constant (Å) | The average crystallite size<br>(nm) |
|----------------------------------|----------------------|--------------------------------------|
| NiCo <sub>2</sub> O <sub>4</sub> | 8.102                | 5.4                                  |
| NiO                              | 4.177                | 18.5                                 |
| Co <sub>3</sub> O <sub>4</sub>   | 8.075                | 14.8                                 |

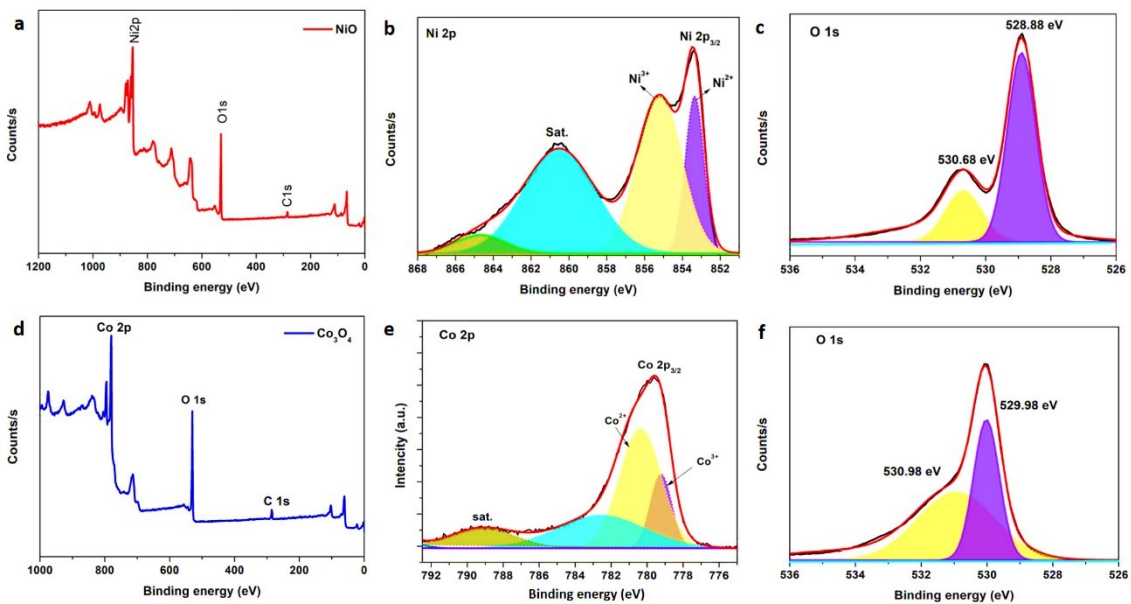

**Fig. S2.** XPS survey scan (a), High-resolution XPS spectra for Ni 2p (b), and O 1s states in NiO (c). XPS survey scan (d), High-resolution XPS spectra for Co 2p (b), and O 1s state in Co<sub>3</sub>O<sub>4</sub>.

**Table S2.** X-ray photoelectron spectra analysis data of the prepared samples.

| Sample                           | Ni 2p <sub>3/2</sub> Position (eV) |                  | Co 2p <sub>3/2</sub> Position (eV) |                  | O 1s Position (eV) |                 |
|----------------------------------|------------------------------------|------------------|------------------------------------|------------------|--------------------|-----------------|
|                                  | Ni <sup>2+</sup>                   | Ni <sup>3+</sup> | Co <sup>2+</sup>                   | Co <sup>3+</sup> | O <sub>I</sub>     | O <sub>II</sub> |
| NiCo <sub>2</sub> O <sub>4</sub> | 853.78                             | 855.58           | 779.38                             | 780.68           | 529.28             | 531.00          |
| NiO                              | 853.48                             | 855.28           | -                                  | -                | 528.88             | 530.68          |
| Co <sub>3</sub> O <sub>4</sub>   | -                                  | -                | 780.88                             | 779.78           | 529.98             | 530.98          |

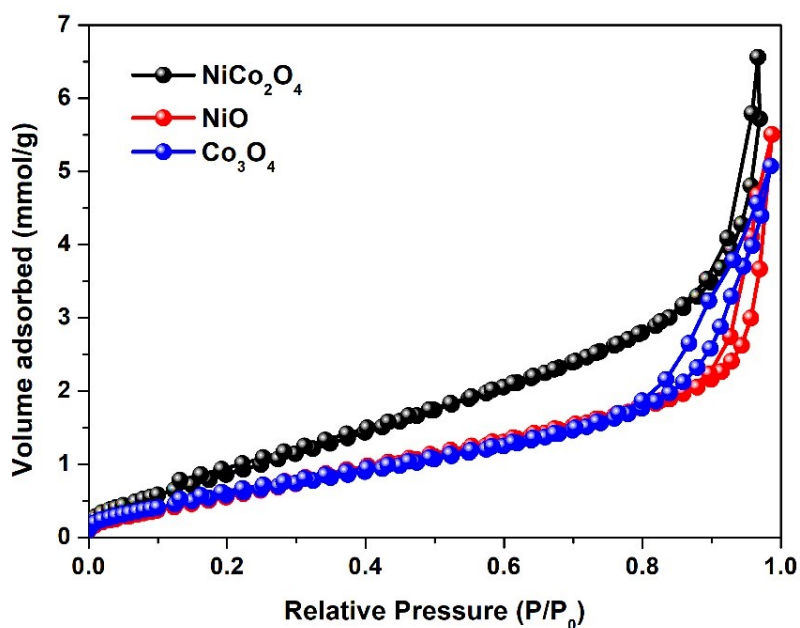

**Fig. S3.** N<sub>2</sub> Adsorption-desorption isotherm of obtained from BET measurements for NiCo<sub>2</sub>O<sub>4</sub>, NiO, and Co<sub>3</sub>O<sub>4</sub> samples.

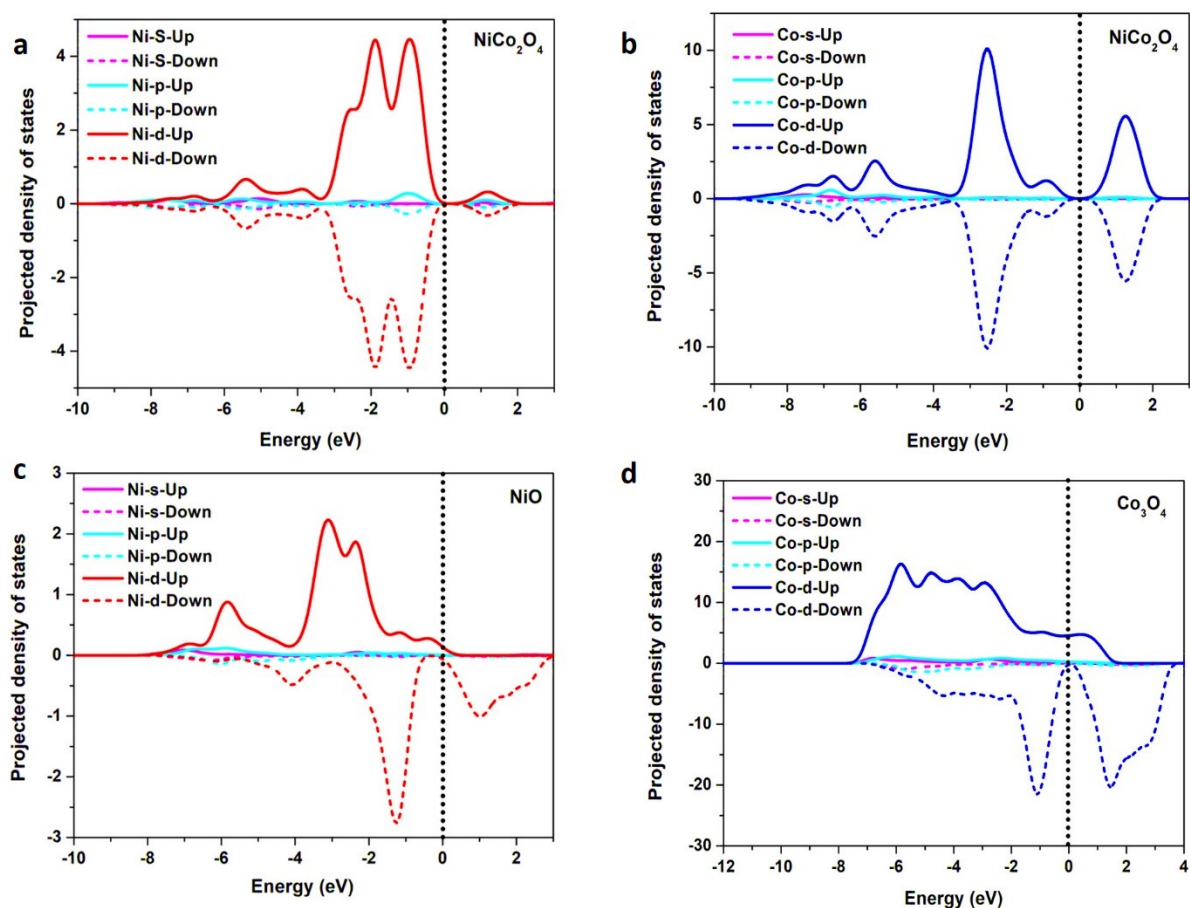

**Fig. S4.** The projected density of states for Ni (a) and Co (b) in  $\text{NiCo}_2\text{O}_4$ , respectively; Ni in  $\text{NiO}$  (c) and Co in  $\text{Co}_3\text{O}_4$  (d). The spin-up PDOS are shown on a positive scale (solid line), while spin-down PDOS are shown on a negative scale (dashed line). The Fermi level is aligned to 0 eV.

The electronic occupancy in the d-orbital is calculated using the following formula<sup>1</sup>:

$$d \text{ orbital occupancy} = \frac{\text{DOS area below Fermi level}}{\text{Total DOS area}} \quad \text{----- (1)}$$

**Table S3.** The electronic d-orbital occupancy in  $\text{NiCo}_2\text{O}_4$ ,  $\text{NiO}$ , and  $\text{Co}_3\text{O}_4$  materials.

| Catalyst                  | Atom | Spin | d orbital occupancy (%) |
|---------------------------|------|------|-------------------------|
| $\text{NiCo}_2\text{O}_4$ | Ni   | Up   | 96                      |
|                           |      | Down | 96                      |
|                           | Co   | Up   | 75                      |
|                           |      | Down | 75                      |
| $\text{NiO}$              | Ni   | Up   | 93                      |
|                           |      | Down | 51                      |
| $\text{Co}_3\text{O}_4$   | Co   | Up   | 98                      |
|                           |      | Down | 66                      |

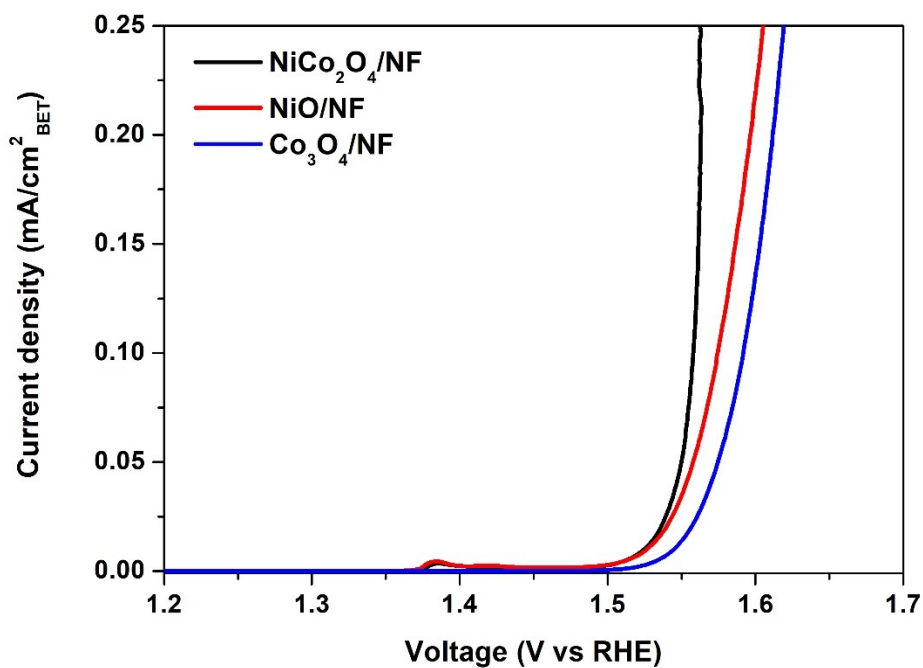

**Fig. S5.** BET surface area normalized linear polarization curves at a scan rate of 1 mV/s NiCo<sub>2</sub>O<sub>4</sub>/NF, NiO/NF, Co<sub>3</sub>O<sub>4</sub>/NF catalysts for OER.

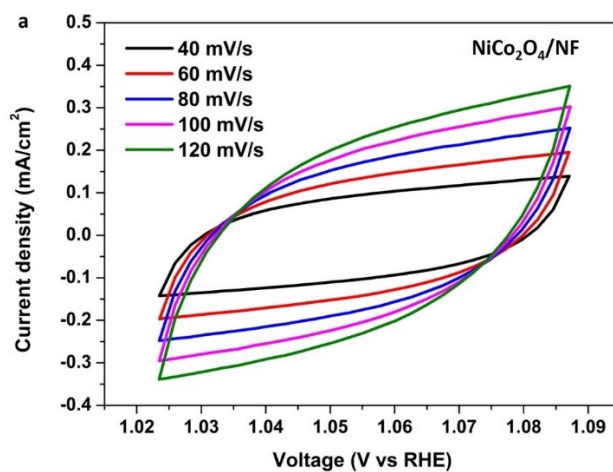

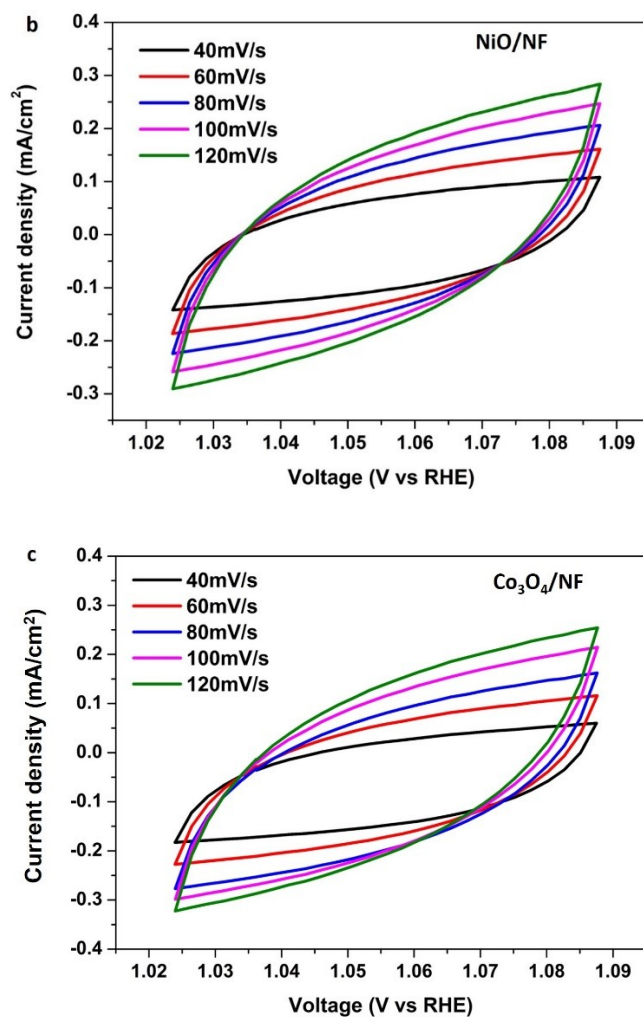

**Fig. S6.** CV curves at various scan rates to determine the double-layer capacitance ( $C_{dl}$ ) of NiCo<sub>2</sub>O<sub>4</sub>/NF, NiO/NF, and Co<sub>3</sub>O<sub>4</sub>/NF catalysts.

**Table S4.** Solution resistance ( $R_s$ ), Charge transfer resistance ( $R_{ct}$ ), and double layer capacitance values of NiCo<sub>2</sub>O<sub>4</sub>/NF, NiO/NF, and Co<sub>3</sub>O<sub>4</sub>/NF catalysts.

| Catalyst                             | $R_s$ ( $\Omega$ cm <sup>2</sup> ) | $R_{ct}$ ( $\Omega$ cm <sup>2</sup> ) | $C_{dl}$ (mF/cm <sup>2</sup> ) |
|--------------------------------------|------------------------------------|---------------------------------------|--------------------------------|
| NiCo <sub>2</sub> O <sub>4</sub> /NF | 1.00                               | 1.15                                  | 1.68                           |
| NiO/NF                               | 1.00                               | 2.44                                  | 1.07                           |
| Co <sub>3</sub> O <sub>4</sub> /NF   | 1.00                               | 3.67                                  | 0.69                           |

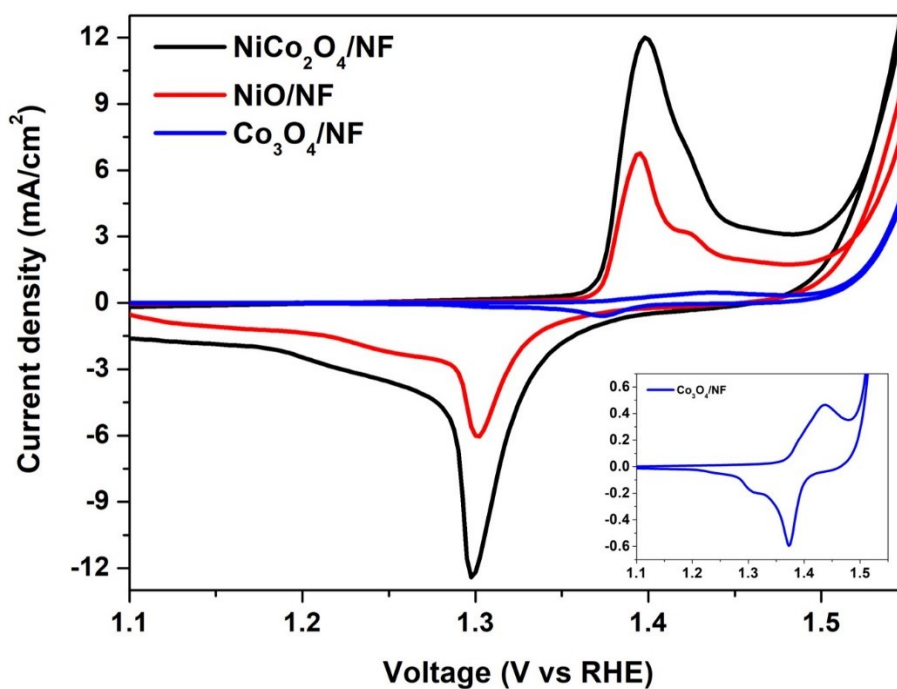

**Fig. S7.** Cyclic voltammetry scan for NiCo<sub>2</sub>O<sub>4</sub>/NF, NiO/NF, and Co<sub>3</sub>O<sub>4</sub>/NF catalysts at a scan rate of 2 mV/s in 1 M KOH.

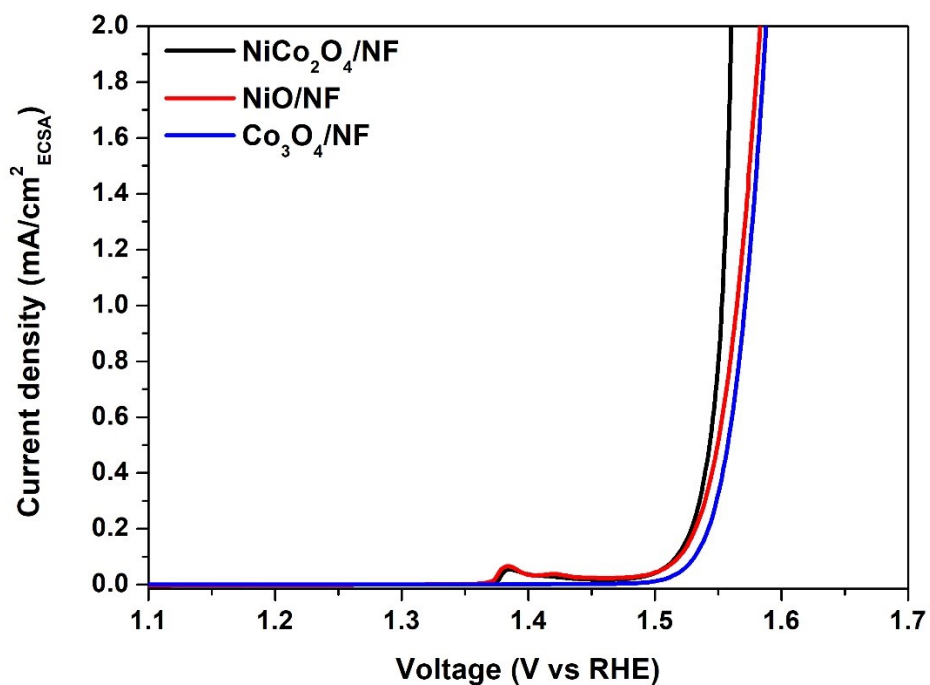

**Fig. S8.** ECSA-corrected LSV curves for NiCo<sub>2</sub>O<sub>4</sub>/NF, NiO/NF, and Co<sub>3</sub>O<sub>4</sub>/NF catalysts.



$$\text{Catalyst utilization (\%)} = \frac{\text{ECSA (m}^2/\text{gm)}}{\text{BET (m}^2/\text{gm)}} \times 100 \quad \text{----- (2)}$$

**Table S5.** Catalyst utilization of NiCo<sub>2</sub>O<sub>4</sub>/NF, NiO/NF, and Co<sub>3</sub>O<sub>4</sub>/NF catalysts.

| Catalyst                             | Utilization (%) |
|--------------------------------------|-----------------|
| NiCo <sub>2</sub> O <sub>4</sub> /NF | 64.28           |
| NiO/NF                               | 62.45           |
| Co <sub>3</sub> O <sub>4</sub> /NF   | 42.75           |

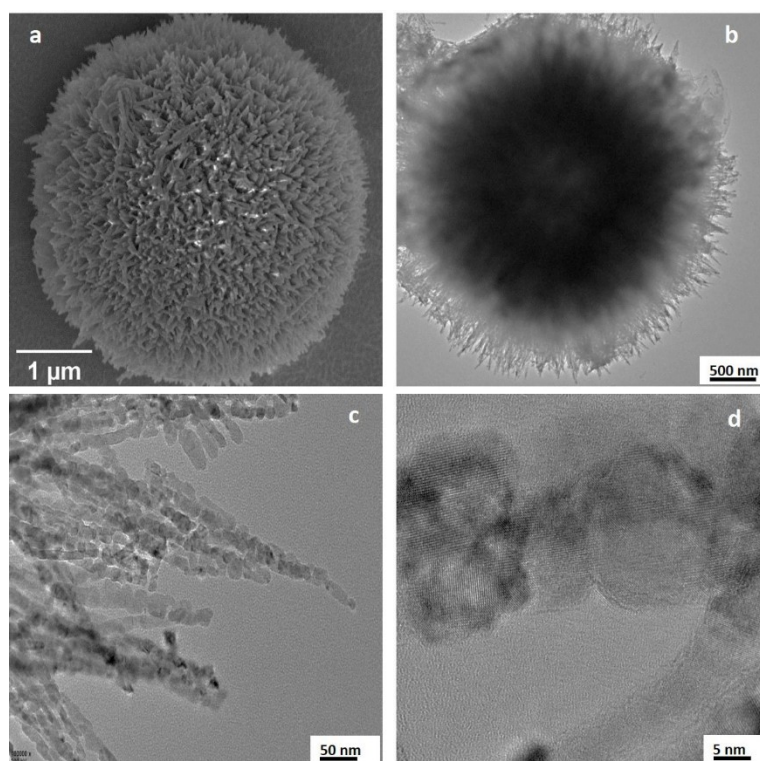

**Fig. S9.** Post-OER SEM (a), low and high magnification TEM images (b-d) of NiCo<sub>2</sub>O<sub>4</sub>/NF catalyst.



**Table S6.** Comparison of recent Ni-based electrocatalysts for OER active in alkaline media.

| Catalyst                                             | Morphology                      | Electrolyte | Over-potential (mV) at 10 mA/cm <sup>2</sup> | Tafel slope (mV/dec) | Stability (hours) | Ref.      |
|------------------------------------------------------|---------------------------------|-------------|----------------------------------------------|----------------------|-------------------|-----------|
| NiCo <sub>2</sub> O <sub>4</sub> /NF                 | Teddy bear sunflower-like       | 1 M KOH     | 290                                          | 37                   | 16                | This work |
| NiO/NF                                               | Spherical                       | 1 M KOH     | 300                                          | 48                   | -                 | This work |
| Co <sub>3</sub> O <sub>4</sub> /NF                   | Sea-urchin                      | 1 M KOH     | 322                                          | 54                   | -                 | This work |
| NiCo <sub>2</sub> O <sub>4</sub>                     | Nanosheets                      | 1 M KOH     | 290                                          | 91                   | 14                | 2         |
| CoMn <sub>2</sub> O <sub>4</sub> /rGO                | Nanorods                        | 0.1 MKOH    | 310                                          | 56                   | -                 | 3         |
| NiCo <sub>2</sub> O <sub>4</sub> /GF                 | Nanoflakes                      | 1 M KOH     | 300                                          | 61                   | 40                | 4         |
| NiCo <sub>2</sub> O <sub>4</sub> @NiMoO <sub>4</sub> | Core-Shell Hybrid Nanorods      | 1 M KOH     | 250                                          | 58.7                 | 12                | 5         |
| NiCo <sub>2</sub> O <sub>4</sub> @C                  | Urchin-like peapod              | 1 M NaOH    | 267                                          | 46.5                 | 30                | 6         |
| Ni@NiCo <sub>2</sub> O <sub>4</sub>                  | Hollow core-shell nanorod array | 1 M KOH     | 270                                          | 67                   | 40                | 7         |
| NiCo <sub>2</sub> O <sub>4</sub>                     | Hollow micro-cuboids            | 1 M NaOH    | 290                                          | 53                   | 32                | 8         |
| Ar-NiCo <sub>2</sub> O <sub>4</sub>  S               | Nanosheet arrays                | 1 M KOH     | 256                                          | 51.1                 | 24                | 9         |
| NiCo <sub>2</sub> O <sub>4</sub> @Ni <sub>2</sub> P  | Nanorods                        | 1 M KOH     | 350                                          | 59                   | 6                 | 10        |

|                                                             |                         |           |     |       |     |    |
|-------------------------------------------------------------|-------------------------|-----------|-----|-------|-----|----|
| NiCo <sub>2</sub> O <sub>4</sub> @Ni<br>WO <sub>4</sub> /NF | Nanorod<br>arrays       | 1 M KOH   | 310 | 102.8 | 12  | 11 |
| NiCo <sub>2</sub> O <sub>4</sub> @<br>MnOx                  | Core-shell<br>nanowires | 0.1 M KOH | 342 | 64    | 100 | 12 |
| N-<br>NiCo <sub>2</sub> O <sub>4</sub> @<br>C@NF            | Nanowires               | 1 M KOH   | 242 | 65    | 25  | 13 |
| NiCo <sub>2</sub> O <sub>4</sub> /Ti                        | Nanosheets              | 1 M KOH   | 353 | 61    | 20  | 14 |
| NiCo <sub>2</sub> O <sub>4</sub> /NiO                       | Nanosheets              | 1 M NaOH  | 360 | 61    | 11  | 15 |
| FeNiP@N-<br>CFs                                             | Nanoparticles           | 1 M KOH   | 300 | 47    | 20  | 16 |

## References

1. T.-C. Chang, Y.-T. Lu, C.-H. Lee, J. K. Gupta, L. J. Hardwick, C.-C. Hu and H.-Y. T. Chen, *ACS omega*, 2021, **6**, 9692-9699.
2. R. Zhao, D. Cui, J. Dai, J. Xiang and F. Wu, *Sustainable Materials and Technologies*, 2020, **24**, e00151.
3. J. Du, C. Chen, F. Cheng and J. Chen, *Inorganic Chemistry*, 2015, **54**, 5467-5474.
4. Z. Liu, H. Tan, D. Liu, X. Liu, J. Xin, J. Xie, M. Zhao, L. Song, L. Dai and H. Liu, *Advanced Science*, 2019, **6**, 1801829.
5. X. Du, J. Fu and X. Zhang, *ChemCatChem*, 2018, **10**, 5533-5540.
6. J. Deng, H. Zhang, Y. Zhang, P. Luo, L. Liu and Y. Wang, *Journal of Power Sources*, 2017, **372**, 46-53.
7. L. Wang, C. Gu, X. Ge, J. Zhang, H. Zhu and J. Tu, *ChemNanoMat*, 2018, **4**, 124-131.
8. X. Gao, H. Zhang, Q. Li, X. Yu, Z. Hong, X. Zhang, C. Liang and Z. Lin, *Angewandte Chemie International Edition*, 2016, **55**, 6290-6294.
9. J. H. Lin, Y. T. Yan, T. X. Xu, C. Q. Qu, J. Li, J. Cao, J. C. Feng and J. L. Qi, *Journal of Colloid and Interface Science*, 2020, **560**, 34-39.
10. Q. Wang, H. Wang, X. Cheng, M. Fritz, D. Wang, H. Li, A. Bund, G. Chen and P. Schaaf, *Materials Today Energy*, 2020, **17**, 100490.
11. X. Du, Q. Shao and X. Zhang, *International Journal of Hydrogen Energy*, 2019, **44**, 2883-2888.
12. L. Zeng, T. Zhao, R. Zhang and J. Xu, *Electrochemistry Communications*, 2018, **87**, 66-70.
13. Y. Ha, L. Shi, X. Yan, Z. Chen, Y. Li, W. Xu and R. Wu, *ACS Applied Materials & Interfaces*, 2019, **11**, 45546-45553.
14. W. Bao, L. Xiao, J. Zhang, P. Jiang, X. Zou, C. Yang, X. Hao and T. Ai, *International Journal of Hydrogen Energy*, 2021, **46**, 10259-10267.
15. C. Mahala and M. Basu, *ACS omega*, 2017, **2**, 7559-7567.
16. R. Mo, S. Wang, H. Li, J. Li, S. Yang and J. Zhong, *Electrochimica Acta*, 2018, **290**, 649-656.
